# Supplementary material
Source: ML conference proceedings conference paper supplement (https://proceedings.mlr.press/v89/tu19a.html)
Supplement: Supplementary file [file tu19a-supp.pdf]

## A Appendix

### A.1 Violation of "no self-masking missingness"

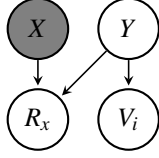

Figure 6: Self-masking missingness indicator with multiple direct causes: TD-PC produces an extra edge between  $X$  and  $Y$ , but such self-masking missingness does not affect the other edges in the causal skeleton results, such as the edge between  $X$  and  $V_i \in \mathbf{V} \setminus \{X, Y\}$ .

In this section, we discuss challenges of the Self-masking Missingness (SFM), and its influences on MVPC.

We note that in the linear Gaussian cases SFM does not affect MVPC, when the SFM indicator  $R_x$  only has one direct cause  $X$ , such as in Figure 1d. In this case, the result of the CI test of  $X$  and  $Y$  in test-wise deleted data implies the correct d-separation relation in the m-graph. With the faithfulness assumption on the m-graph, we have  $X \perp\!\!\!\perp Y \iff X \perp\!\!\!\perp Y | R_x$ ; furthermore, under the faithful observability assumption, we have  $X \perp\!\!\!\perp Y | R_x \iff X^* \perp\!\!\!\perp Y | R_x = 0$  and  $X^* \perp\!\!\!\perp Y | R_x = 0$  is what we test in the test-wise deleted data of  $X$  and  $Y$ .

SFM affects MVPC results when the SFM indicator  $R_x$  has multiple direct causes. For example, as the m-graph in Figure 6 shown, conditioning on the missingness indicator which is the direct common effect of two variables in a CI test produces an extraneous edge between them in the result given by MVPC. Removing such extraneous edges is challenging, because our correction methods are not applicable to the self-masking missingness scenario. However, such self-masking missingness indicator does not affect the other edges between  $X$  and variables in  $\mathbf{V} \setminus \{X, Y\}$  in the causal skeleton resulted by MVPC. Therefore, we specify in the output that edges between the self-masking variable and other direct causes of the self-masking missingness indicator are uncertain.

### A.2 Proofs of the propositions

*Proof.* Proposition 1

$X \perp\!\!\!\perp Y | \{\mathbf{Z}, \mathbf{R}_z = \mathbf{0}, R_x = 0, R_y = 0\} \Rightarrow X \perp\!\!\!\perp Y | \mathbf{Z}$ : We have  $X \perp\!\!\!\perp Y | \{\mathbf{Z}, \mathbf{R}_z = \mathbf{0}, R_x = 0, R_y = 0\}$ , where some of the involved missingness indicators may only take value 0 (i.e., the corresponding variables do not have missing values). With the faithful observability assumption, the above condition implies  $X \perp\!\!\!\perp Y | \{\mathbf{Z}, \mathbf{R}_z, R_x, R_y\}$ . Because of the faithfulness assumption on m-graphs, we know that  $X$  and  $Y$  are d-separated by  $\{\mathbf{Z}, \mathbf{R}_z, R_x, R_y\}$ ; furthermore, with Assumption 1, 3, and 4 the missingness indicators can only be

leaf nodes in the m-graph. Therefore, conditioning on these nodes will not destroy the above d-separation relation. That is, in the m-graph,  $X$  and  $Y$  are d-separated by  $\mathbf{Z}$ . Hence, we have  $X \perp\!\!\!\perp Y | \mathbf{Z}$ .  $\square$

*Proof.* Proposition 2

The condition of Proposition 2 implies that for nodes  $X, Y$  and any node set  $\mathbf{Z} \subseteq \mathbf{V} \setminus \{X, Y\}$  in a m-graph, conditioning on  $\mathbf{Z}$  and missingness indicators  $R_x, R_y$ , and  $\mathbf{R}_z$ , there always exists an undirected path  $U$  between  $X$  and  $Y$  that is not blocked. Furthermore, to satisfy such constraint of  $U$ , at least a missingness indicator  $R_i \in \{R_x, R_y, \mathbf{R}_z\}$  satisfies either one of the following two conditions: (1)  $R_i$  is the only vertex on  $U$ ; (2) A cause of  $R_i$  is the only vertex on  $U$  as a collider. In Condition (1), if  $R_i$  is on  $U$ , it is a collider because under Assumptions 1-4, missingness indicators are the leaf nodes in m-graphs. Then, suppose that  $R_i$  is not the only vertex on  $U$ , and that another node  $V_j \in \mathbf{V} \setminus \{X, Y, \mathbf{Z}\}$  is also on  $U$ . Conditioning on  $V_j$  and  $R_i$ ,  $U$  is blocked, which is not satisfied the constraint of  $U$ . Thus,  $R_i$  should be the only vertex on  $U$ . The same reason also applies to Condition (2). In summary, we conclude that under the condition of Proposition 2, there is at least one missingness indicator  $R_i \in \{R_x, R_y, \mathbf{R}_z\}$  such that  $R_i$  is the direct common effect or a descendant of the direct common effect of  $X$  and  $Y$ .  $\square$

### A.3 Detection of direct causes of missingness indicators

In Step 2 of Algorithm 1, detecting direct causes of missingness indicators is implemented by the causal skeleton discovery procedure of TD-PC. For each missingness indicator  $R_i$ , the causal skeleton discovery procedure checks all the CI relations between  $R_i$  and variables in  $\mathbf{V} \setminus V_i$ , and tests whether  $R_i$  is conditionally independent of a variable  $V_j \in \mathbf{V} \setminus V_i$  given any variable or set of variables connected to  $R_i$  or  $V_j$ . If they are conditionally independent, the edge between  $R_i$  and  $V_j$  is removed. Under Assumptions 1-4, no extra edge is produced by the causal skeleton discovery procedure because according to Proposition 2, an extraneous edge only occurs when  $R_i$  and  $V_j$  have at least one direct common effect. Therefore, all the variables adjacent to  $R_i$  are its direct causes because  $R_i$  is either an effect or a cause, and we assume that  $R_i$  cannot be a cause in Assumption 1.  $\square$
